# Supplementary material for: Marine snow morphology drives sinking and attenuation in the ocean interior
Source: Copernicus journal article supplement (doi:10.5194/egusphere-2024-3302), 2024-11-07
Supplement: Supplementary file [file egusphere-2024-3302-AC2-supplement.pdf]

Reviewed figures (and additional figures only for reviewer2) of the manuscript «**Marine snow morphology drives sinking and attenuation in the ocean interior**» MS No.: egosphere-2024-3302

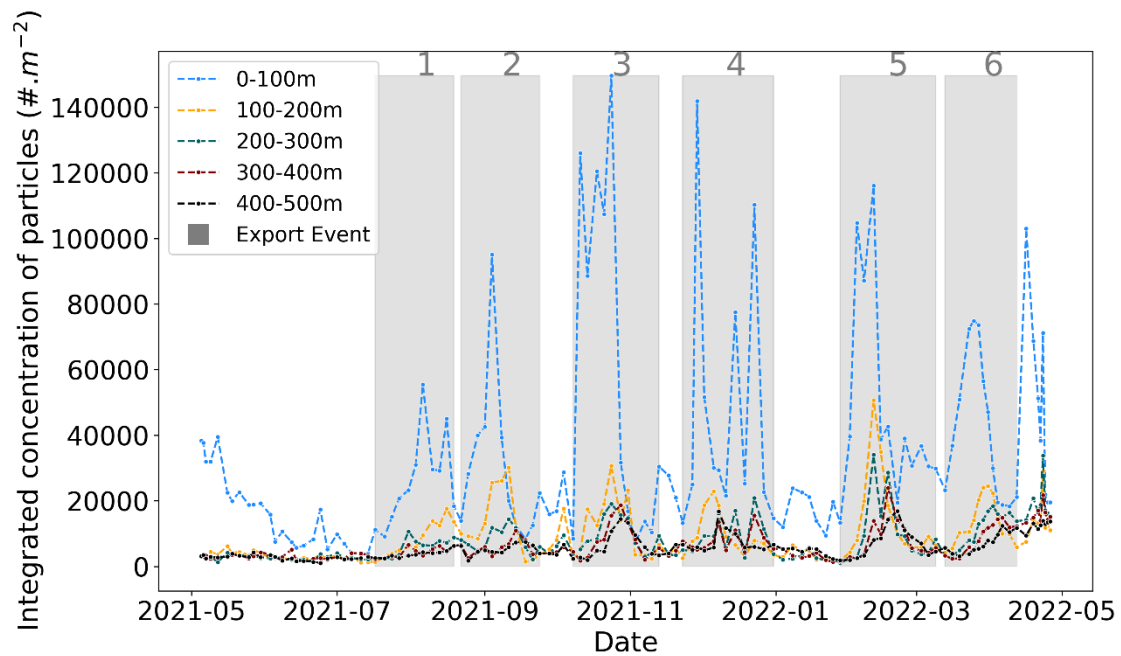

Figure 2: Time series of vertically integrated marine snow (MaP, all particles >600 $\mu$ m) concentrations (# m<sup>-2</sup>) in 5 layers in the upper 1000 m depth. The 6 bloom periods shaded in gray correspond to six export events that are marked by delayed peaks in the mesopelagic. The periods are defined for the events in 2021 as 07/17-08/19, 08/22-09/24, 08/10-11/13, 11/23-12/31 and in 2022 as 01/28-03/09 and 03/13 to 04/12.

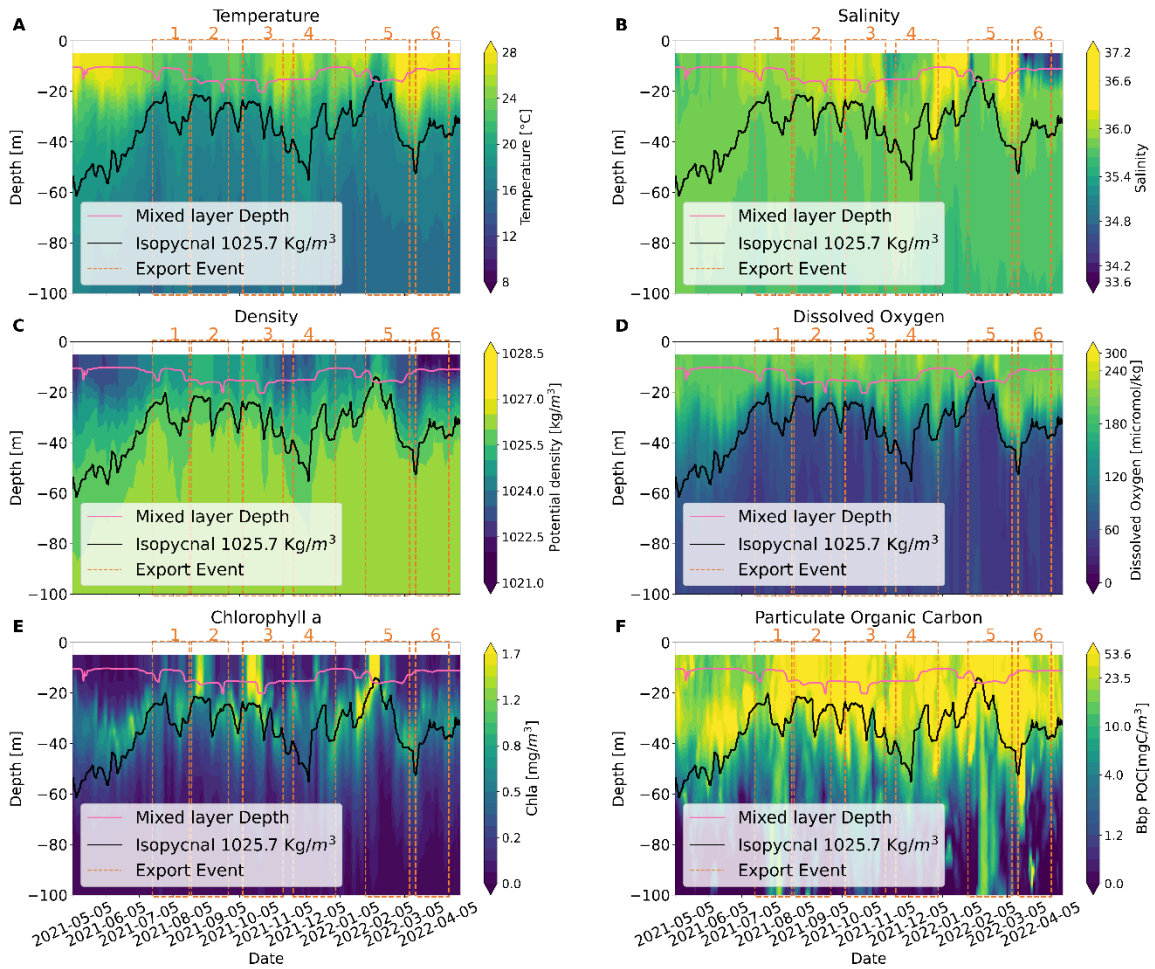

**Figure 3 : 0-100 m, 2D time series of A) temperature, B) salinity, C) density, D) dissolved oxygen, E) chlorophyll *a* concentration and F) Bbp POC. The black line depicts the 1025.7 kg m<sup>-3</sup> isopycnal. The red line represents the mixed layer depth.**

### 3.2 Full Depth (0-1000m) time series of Bbp POC, MiP and MaP

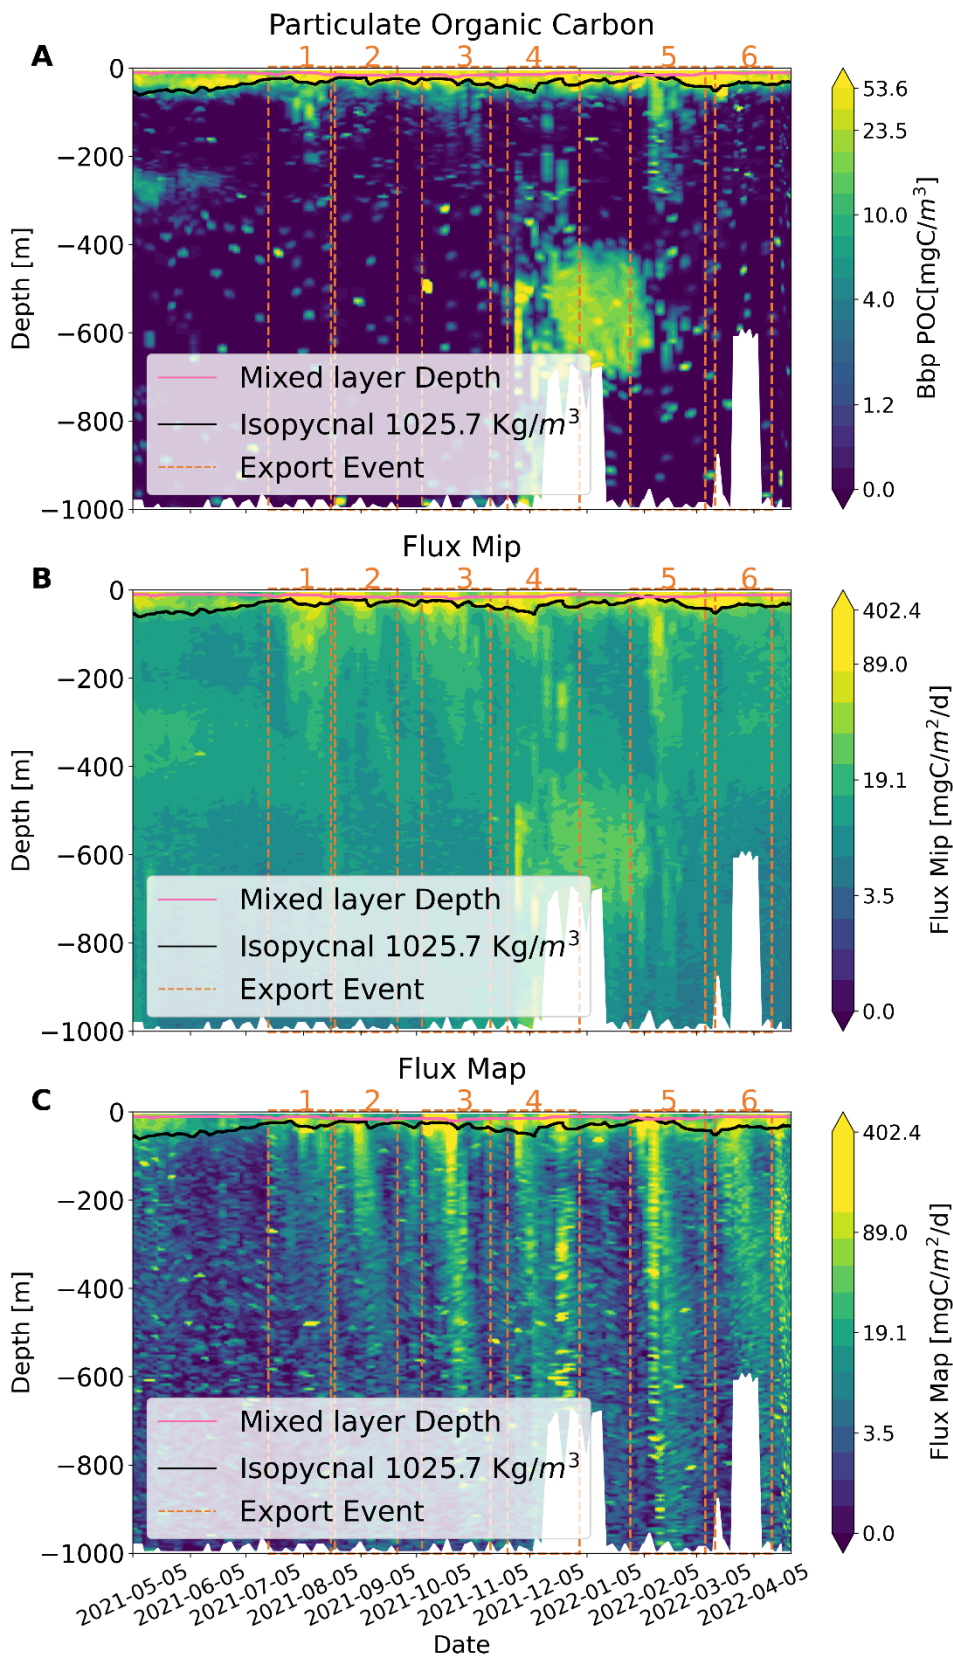

Figure 4: Time–depth profiles determined from the BGC Argo float for A) Bbp POC, B) MiP flux, and C) MaP flux (in logarithmic scale) as a function of time and depth with the 6 export periods being illustrated by the red vertical dashed lines. The black line depicts the  $1025.7 \text{ kg m}^{-3}$  isopycnal. The maximum depth of the float corresponds to the bottom depth, marked by a white mask. The red line represents the mixed layer depth.

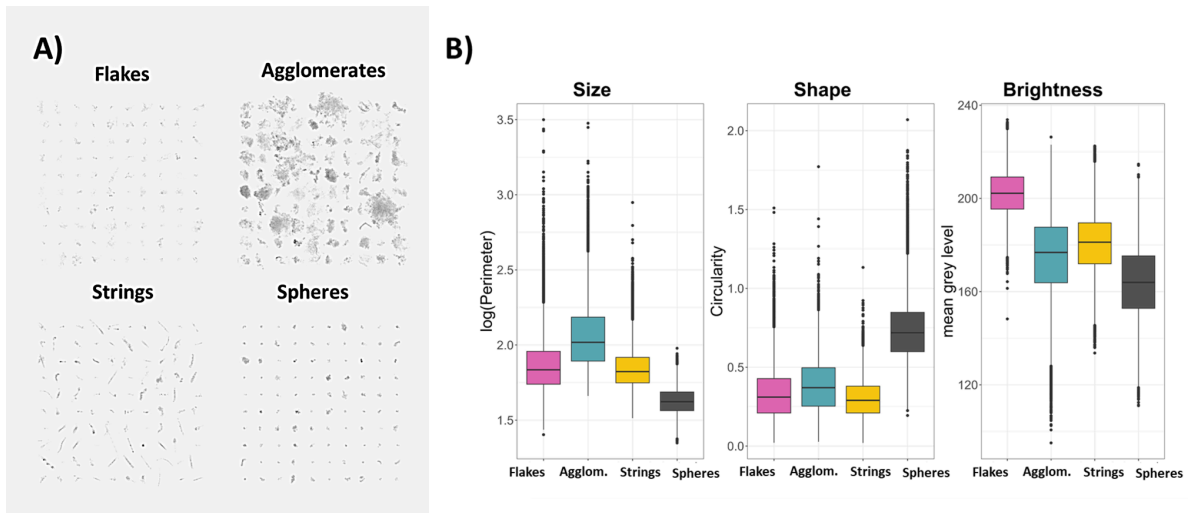

Figure 5: A) Example vignettes of the four defined morphotypes (flakes, agglomerates, strings and spheres), we applied microsoft windows photo software changes to the vignettes with contrast (-40%), brightness (-8%), sharpness (100%) and B) their mean morphological traits describing main aspects of size (via perimeter ( $\mu\text{m}$ )), shape (via circularity, dimensionless) and brightness (via mean grey level, dimensionless range 0 black to 256 white pixel).

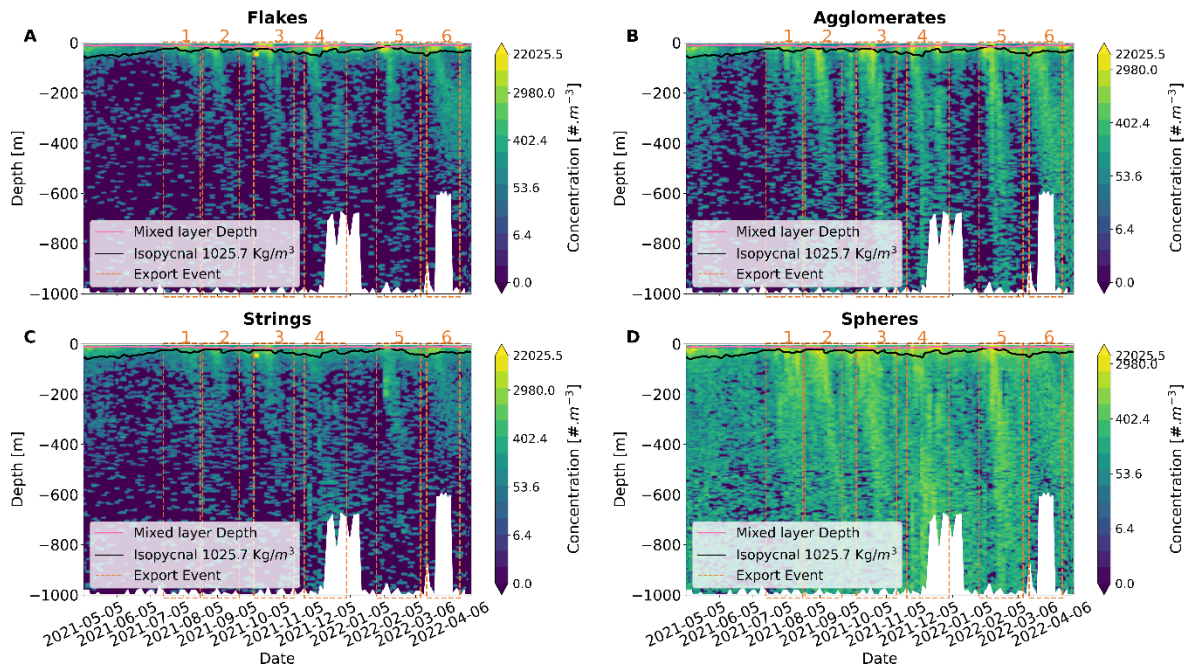

Figure 6: Contour plot of the four marine snow types: A) Flakes, B) Agglomerate, C) Strings, D) Spheres, as a function of time and depth. The 6 export events are depicted by the red vertical dash lines. The black line depicts the  $1025.7 \text{ kg m}^{-3}$  isopycnal. The maximum depth of the float corresponds to the bottom depth, marked by a white mask.



**Additional Figures based on particle biovolumes for Review only**

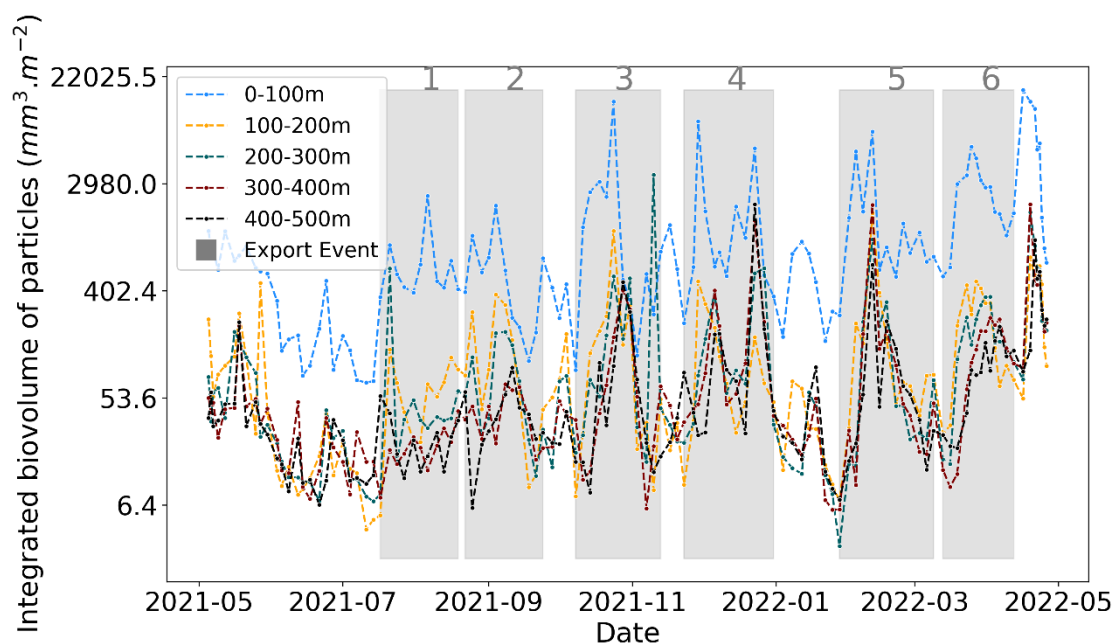

Figure S2: Time series of vertically integrated marine snow (MaP, all particles  $>600\mu\text{m}$ ) biovolume ( $\text{mm}^3\cdot\text{m}^{-2}$ ) in 5 layers in the upper 1000 m depth. The 6 bloom periods shaded in gray correspond to six export events that are marked by delayed peaks in the mesopelagic. The periods are defined for the events in 2021 as 07/17-08/19, 08/22-09/24, 08/10-11/13, 11/23-12/31 and in 2022 as 01/28-03/09 and 03/13 to 04/12.

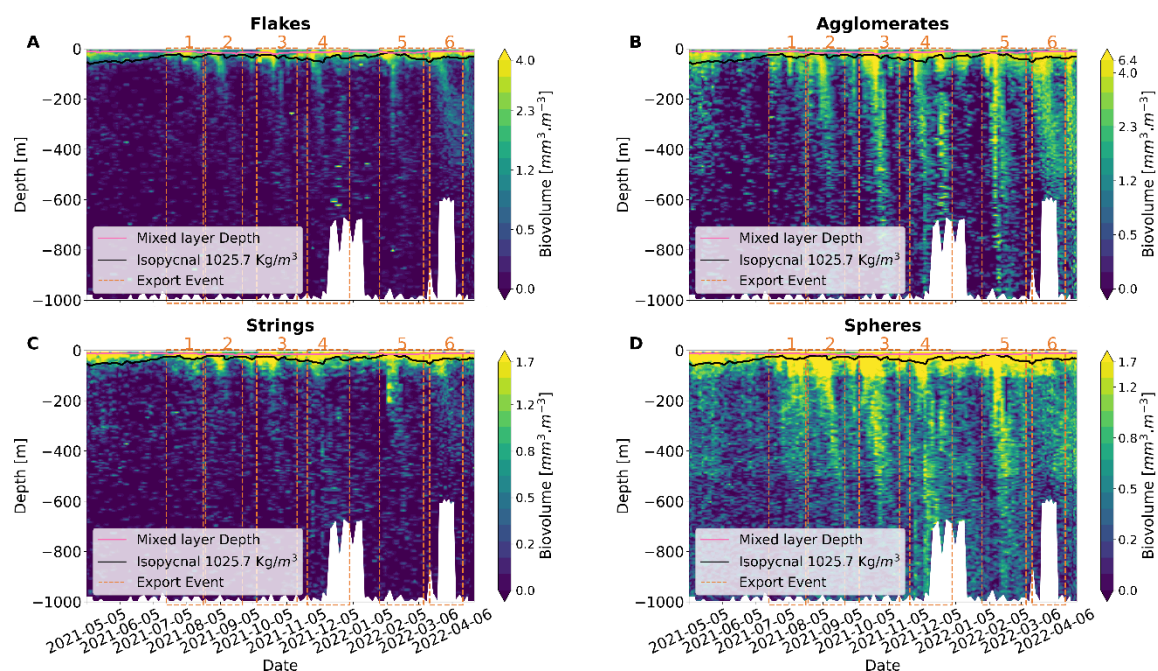

Figure S6: Contour plot of the four marine snow types based on particle biovolumes: A) Flakes, B) Agglomerate, C) Strings, D) Spheres, as a function of time and depth. The 6 export events are depicted by the red vertical dash lines. The black line depicts the  $1025.7 \text{ kg m}^{-3}$  isopycnal. The maximum depth of the float corresponds to the bottom depth, marked by a white mask.
